# Supplementary material
Source: PubMed Central journal article supplement (PMC5304352)
Supplement: supp_tpc.16.00720_TPC2016-00720-RAR1_Supplemental_Material.pdf [file supp_tpc.16.00720_TPC2016-00720-RAR1_Supplemental_Material.pdf]

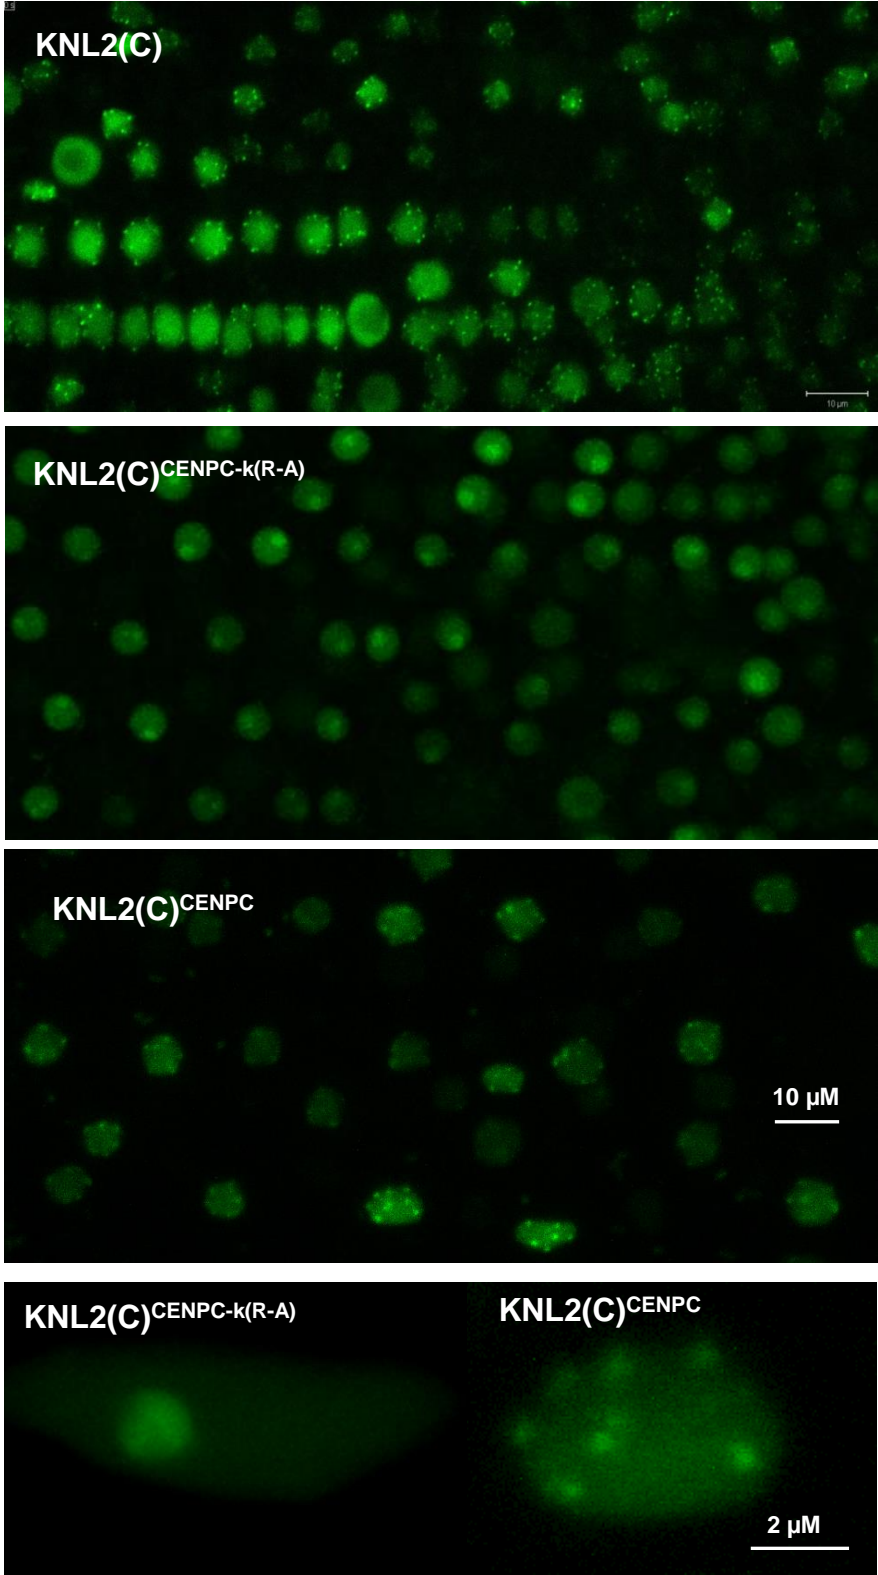

**Supplemental Figure 1**  
**Large scale and higher magnification view of localization of KNL2(C), KNL2(C)<sup>CENPC-k(R-A)</sup> and KNL2(C)<sup>CENPC</sup> fused to EYFP in root tips of stable transformants of *A. thaliana*.**  
Corresponding small scale view is presented on Figure 2.

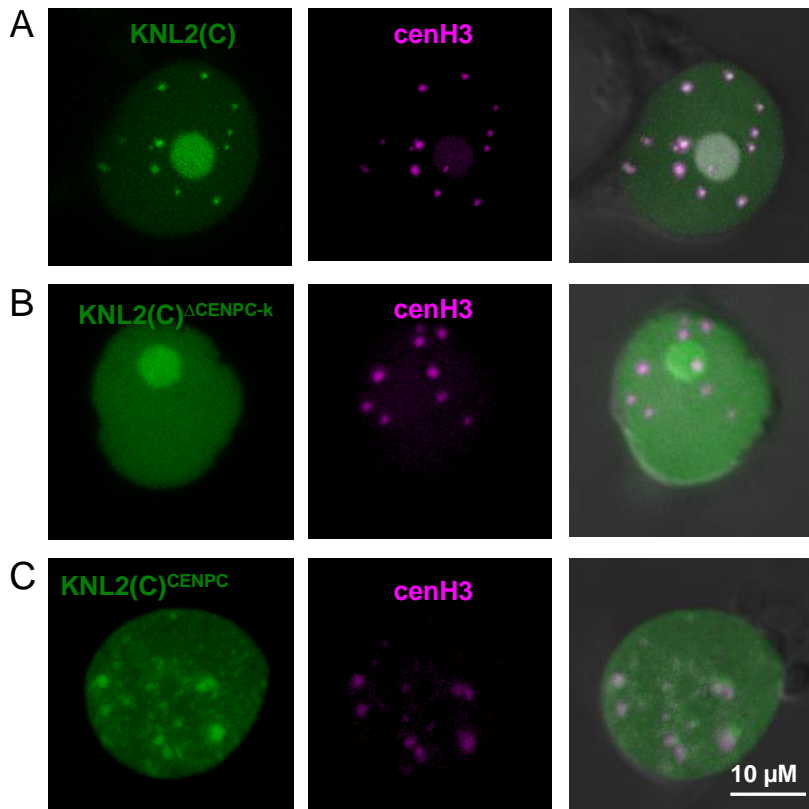

### Supplemental Figure 2

#### The CENPC motif of CENP-C protein restores the ability of KNL2(C)<sup>ΔCENPC</sup> to localize at centromeres.

Localization of native KNL2(C) (A), mutagenized KNL2 with deleted CENPC-k motif (KNL2(C)<sup>ΔCENPC-k</sup>) (B), and mutagenized KNL2 with CENPC-k motif substituted by the CENPC motif of the CENP-C protein (KNL2(C)<sup>CENPC</sup>) (C) fused to EYFP in nuclei of *Nicotiana benthamiana* transiently expressing the corresponding constructs. To visualize centromeres, all three constructs were infiltrated together with a construct expressing a cenH3-mCherry fusion protein.

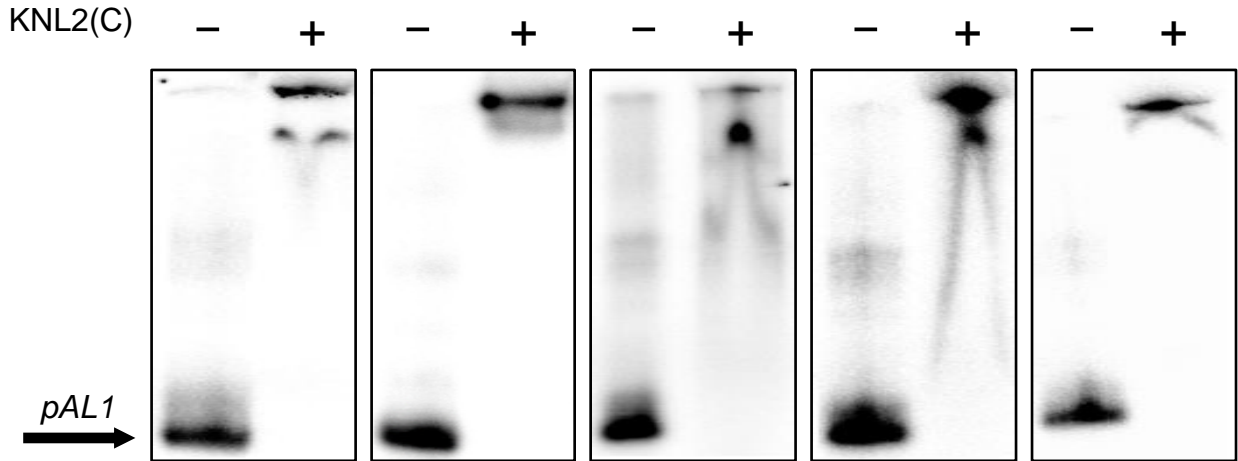

**Supplemental Figure 3**

**The C-terminal part of KNL2 binds the centromeric *pAL1* sequences also in radioactive EMSA.**

Five different radioactive EMSA experiments with 0,2 pmol labeled *pAL1* (all lanes) without (-) or with (+) 1-2 pmol purified recombinant C-terminal KNL2. Complexes of *pAL1* and KNL2(C) remain close to the slots similar to non-radioactive EMSA experiments.



Sequence: MTEPNLDEEDGSKSSFQKTVVLRDWWLIKCPKEFEGKQFGVAGFEESVETRAMRVFTSSPI  
 Prediction: -----+-----  
 Confidence: 514779765520002102679385689276245672556999777175214595410015

Sequence: TKALDVFTLLASDGIYITLRGFLNKERVLKNGFNPEISREFIFGFPPCWERVNCSFEGD  
 Prediction: -----+-----  
 Confidence: 126879839783767270696485150561468332720569787876350665368688

Sequence: SFGTDVNTVPSTIEKACPPILSPCKYSNRNLKDNPAESREKSNVTETDIAEINDKGGSGA  
 Prediction: -----+-----+-----  
 Confidence: 377256318321530955465122000091614326409211251428999957145134

Sequence: RDIKTARRRSLHLQIKRILESSKVRKTANDGDHGSEFLNTAKRGDVERDGCEVINNEDSE  
 Prediction: +-+++-----+-----  
 Confidence: 923004999042547115630105901446765835573262063782889899648936

Sequence: WKLDESEVQNLCNDGNGSEGFIAKAKSSDVEKDKSEAIDNDVISPAVGSIGIKHTGADNVD  
 Prediction: -----  
 Confidence: 639875695698777746235571501227528235899799924775145022577677

Sequence: KVTSASATGESLTSEQQNGLLVTTASPHSLLKDLAKSSKPEKKGISKKSGKILRSDDNVV  
 Prediction: -----+-----+-----  
 Confidence: 170140403104114354675500503216616571009030024090030561386699

Sequence: DPMNYSGTKVKSANRKRKIDASKLQSPSTSNVAEHSKEGLNNAKSNVDEKDVCAINNEVI  
 Prediction: -----+-----+-----  
 Confidence: 865410209400222200525194002012554411257326012389599999956689

Sequence: SPVKGFGKRLSGTDVERLTSKNATKESLTSVQRKGRVKVSKAFQDPLSKGKSKKSEKTLQ  
 Prediction: -----+-----+-----+-----+-----+-----  
 Confidence: 249053600514257307100030910510510039304105635361929899919031

Sequence: SNSNVVEPMNHRSEAEAEENLSWEKIKRKRKIDFDVEVTPEKKVKQQTNAASTDSLQKQK  
 Prediction: -----  
 Confidence: 141378776536045899987682220711278999791330030010112301115301

Sequence: RSRSGRVLVSSLEFWRNQIPVYMDRNLIQVKDGETNSAPSKGKGSDSRKRRNLKIK  
 Prediction: +-+-----+-----+-----+-----+-----  
 Confidence: 9190395571173661438683789377946164220102289191900999902040

\*\*\* Prediction: binding residues are labeled with '+' and in red;  
 non-binding residues labeled with '-' and in green.  
 \*\*\* Confidence: from level 0 (lowest) to level 9 (highest).

### Supplemental Figure 5

#### *In silico* analysis of KNL2 protein by BindN program (Wang and Brown 2006) for DNA binding amino acid residues

To check for a possible DNA binding region in KNL2 the BindN program was used. Multiple residues with high DNA binding probability (red frame) arise at the C-terminus around the CENPC-k motif (blue frame).

## Supplemental Table 1

## Primers used in this study.

| Primer name                               | Primer sequence                                                                                                                                                                                                         | Reference                 |
|-------------------------------------------|-------------------------------------------------------------------------------------------------------------------------------------------------------------------------------------------------------------------------|---------------------------|
| <b>Side-directed mutagenesis</b>          |                                                                                                                                                                                                                         |                           |
| KNL2_R_A_f                                | GTCAAGATCAGGAGCGGTGCTTGTGTCATC                                                                                                                                                                                          |                           |
| KNL2_R_A_r                                | GTTTCTGTCCCAATGAATCAGTAGACGCCGC                                                                                                                                                                                         |                           |
| KNL2_W_R_f                                | CATCACTAGAGTTTCGGCGTAACCAAATTC                                                                                                                                                                                          |                           |
| KNL2_W_R_r                                | ACACAAGCACCCCTCCTGATCTTGACCGTT                                                                                                                                                                                          |                           |
| KNL2_ΔCENPC_f                             | GATGGTAGTGAGACTAACTCCGCTC                                                                                                                                                                                               |                           |
| KNL2_ΔCENPC_r                             | TCCCAATGAATCAGTAGACGCCGC                                                                                                                                                                                                |                           |
| CENP-Csubst_fr1                           | GCATCCATGAGAGTTTACTACTGTTGATGGT                                                                                                                                                                                         |                           |
|                                           | AGTGAGACTAACTCCGCTC                                                                                                                                                                                                     |                           |
| CENP-Csubst_rev1                          | GTCCGTACAAGAATCTTTCACCTCTTCCCAAT                                                                                                                                                                                        |                           |
|                                           | GAATCAGTAGACGCCGC                                                                                                                                                                                                       |                           |
| CENP-Csubst_fr2                           | TAAAGTCGAGACCGCTCGAATACTGGAGAGGT                                                                                                                                                                                        |                           |
|                                           | GAAAGATTCTGTACGGAC                                                                                                                                                                                                      |                           |
| CENP-Csubst_rev2                          | TCCTTGTACTTCGTCTGACACCACCTCCCAAT                                                                                                                                                                                        |                           |
|                                           | GAATCAGTAGACGCCGC                                                                                                                                                                                                       |                           |
| <b>Generation of DNA samples</b>          |                                                                                                                                                                                                                         |                           |
| Athila_f                                  | ATCACGTTGCCGACATCATAACG                                                                                                                                                                                                 |                           |
| Athila_r                                  | AGCAACAACGAAAGAGTTGAGAGC                                                                                                                                                                                                |                           |
| Telomere_f                                | TTTAGGGTTTAGGGTTTAGGGTTTAGGG                                                                                                                                                                                            | (Yu et al., 2000)         |
| Telomere_r                                | AAATCCCAAATCCCAAATCCCAAATCCC                                                                                                                                                                                            | (Yu et al., 2000)         |
| TUA4_f                                    | GCTGTTGGTGGAGGGACTGG                                                                                                                                                                                                    | (Ay et al., 2009)         |
| TUA4_r                                    | CCTGTGGAGATGGGTAAACTGTG                                                                                                                                                                                                 | (Ay et al., 2009)         |
| pAL1_f                                    | GGTTAGTGTTTTGGAGTCGAATATG                                                                                                                                                                                               | (May et al., 2005)        |
| pAL1_r                                    | TTGCTTCTCAAAGATTTTCATGGT                                                                                                                                                                                                | (May et al., 2005)        |
| <b>ChIP and qPCR</b>                      |                                                                                                                                                                                                                         |                           |
| Athila_f (0.1μM)*                         | ATCACGTTGCCGACATCATAACG                                                                                                                                                                                                 |                           |
| Athila_r (0.1μM)                          | AGCAACAACGAAAGAGTTGAGAGC                                                                                                                                                                                                |                           |
| Subtelo_f (0.25μM)                        | CTAAACTAGTTGTGTTCCCGTCTCTACT                                                                                                                                                                                            | (Gallego and White, 2001) |
| Subtelo_r (0.25μM)                        | GGTGGGCGACCTTGTGCTTGCCAAAGTC                                                                                                                                                                                            | (Gallego and White, 2001) |
| TUA4_f (0.04μM)                           | GCTGTTGGTGGAGGGACTGG                                                                                                                                                                                                    | (Ay et al., 2009)         |
| TUA4_r (0.04μM)                           | CCTGTGGAGATGGGTAAACTGTG                                                                                                                                                                                                 | (Ay et al., 2009)         |
| pAL1_f (0.05μM)                           | GGTTAGTGTTTTGGAGTCGAATATG                                                                                                                                                                                               | (May et al., 2005)        |
| pAL1_r (0.05μM)                           | TTGCTTCTCAAAGATTTTCATGGT                                                                                                                                                                                                | (May et al., 2005)        |
| <b>ssRNA</b>                              |                                                                                                                                                                                                                         |                           |
| 23 bp ssRNA of pAL1<br>forward pAl1 ssRNA | ACAAGGAUACAAUUCUUACGCCU<br>GGUUAUGUUUUGGAGUCGAAUAUGACUUGAUC<br>GAUCUCAUGUGUAUGAUUGAGUAUAAGAACUU<br>AAAACGCAACCGCAUCUUAAAAGCCUAAGUAG<br>UAUUUCCUUGUUAGAAGACACAAAGCCAAGAC<br>UCAUAUGGACUUUGGCUACCAUGAAAGCUU<br>UGAGAAGCAA | (Zhang et al., 2008)      |
| reverse pAl1 ssRNA                        | UUGCUUCUCAAAAGCUUUCUAGGUGUAGCCAAA<br>GUCCAUAUGAGUCUUGGCUUUGUGUCUUCUAA<br>CAAGGAAAACUACUUAGGCUUUUAAGAUGCG<br>GUUGCGUUUUAAGUUCUUUAUACUCAAUCAUAC<br>ACAUGAGAUCGAUCAAGUCAUUAUCGACUCCA<br>AAACAUAAACC                        | (Zhang et al., 2008)      |

\*-final concentration of primers

## Supplemental Table 2

### PCR programs used for the amplification of DNA probes for EMSA.

| DNA fragment    | PCR program                                                                         |
|-----------------|-------------------------------------------------------------------------------------|
| <i>Athila</i>   | 94°C – 5 min / (94°C – 20 s, 54°C – 30 s, 72°C – 1 min)x45 / 72°C – 7 min / 4°C - ∞ |
| <i>TUA4</i>     | 94°C – 5 min / (94°C – 20 s, 60°C – 30 s, 72°C – 1 min)x35 / 72°C – 7 min / 4°C - ∞ |
| <i>Telomere</i> | 94°C – 5 min / (94°C – 20 s, 60°C – 30 s, 72°C – 5 s)x35 / 4°C - ∞                  |
| <i>pAL1</i>     | 94°C – 5 min / (94°C – 20 s, 50°C – 30 s, 72°C – 3 s)x40 / 4°C - ∞                  |

## REFERENCES

- Ay, N., Irmeler, K., Fischer, A., Uhlemann, R., Reuter, G., and Humbeck, K.** (2009). Epigenetic programming via histone methylation at WRKY53 controls leaf senescence in *Arabidopsis thaliana*. *Plant J* **58**, 333-346.
- Gallego, M.E., and White, C.I.** (2001). RAD50 function is essential for telomere maintenance in *Arabidopsis*. *P Natl Acad Sci USA* **98**, 1711-1716.
- May, B.P., Lippman, Z.B., Fang, Y., Spector, D.L., and Martienssen, R.A.** (2005). Differential regulation of strand-specific transcripts from *Arabidopsis* centromeric satellite repeats. *Plos Genet* **1**, e79.
- Yu, E.Y., Kim, S.E., Kim, J.H., Ko, J.H., Cho, M.H., and Chung, I.K.** (2000). Sequence-specific DNA recognition by the Myb-like domain of plant telomeric protein RTBP1. *J Biol Chem* **275**, 24208-24214.
- Zhang, W., Lee, H.R., Koo, D.H., and Jiang, J.** (2008). Epigenetic modification of centromeric chromatin: hypomethylation of DNA sequences in the CENH3-associated chromatin in *Arabidopsis thaliana* and maize. *The Plant cell* **20**, 25-34.
